# Supplementary material for: Cocktails of Mycotoxins, Phytoestrogens, and Other Secondary Metabolites in Diets of Dairy Cows in Austria: Inferences from Diet Composition and Geo-Climatic Factors
Source: MDPI journal article supplement (doi:10.3390/toxins14070493), 2022-07-15

# Cocktails of Mycotoxins, Phytoestrogens, and Other Secondary Metabolites in Diets of Dairy Cows in Austria: Inferences from Diet Composition and Geoclimatic Factors

Felipe Penagos-Tabares, Ratchaneewan Khiaosa-ard, Marlene Schmidt, Eva-Maria Bartl, Johanna Kehrer, Veronika Nagl, Johannes Faas, Michael Sulyok, Rudolf Krska and Qendrim Zebeli

**Table S1.** List of 863 targeted metabolites via a validated multi-metabolite liquid chromatography/electrospray ionization-tandem mass spectrometric (LC/ESI–MS/MS). \* Compounds found in diets of Austrian dairy cows (values > the LOD)

|                              |                                  |                             |                           |
|------------------------------|----------------------------------|-----------------------------|---------------------------|
| 10-Norparvulenone            | Aflatoxin M2                     | Apicidin                    | Aurantine                 |
| 15-Acetyldeoxynivalenol      | Aflatoxin P1                     | Apidicin C                  | Aurantioclavin            |
| 15-Desoxyoxalicine B         | Aflatoxin Q1                     | Apidicin D2*                | Aurantiogliocladin        |
| 15-Hydroxyculmorin*          | Aflatrem                         | Aristolochic acid A         | Aurasperon B              |
| 15-Hydroxyculmoron           | Aflavarin                        | Ascochlorin*                | Aurasperon C              |
| 16-Ketoaspergillimide        | Agistatin B                      | Ascofuranone*               | Aurasperon G              |
| 1-Deoxypebrolide             | Agistatin D                      | Ascolactone                 | Aureobasidin              |
| 2-Chlorunguinol              | Agistatin E                      | Ascomycin                   | Aurofusarin*              |
| 2-Methylmitorubin            | Agroclavine                      | Asparason A                 | Austalide A               |
| 3,4,15-Triacetylivalenol     | Aigalomycin D                    | Aspercolorin                | Austalide B               |
| 3,4-Diacetylivalenol         | AJ 296                           | Asperflavine                | Austalide Derivative      |
| 3-Acetyldeoxynivalenol       | Alamethicin*                     | Asperfuran                  | Austalide F               |
| 3-Acetylneosolaniol          | alpha-Zearalenol                 | Aspergamid A                | Austamide                 |
| 3-Acetyl-T-2 Toxin           | alpha-Zearalenol Glucoside       | Aspergillicin Derivat       | Austdiol                  |
| 3-Hydroxy-3-acetyl-T-2 Toxin | Alteichin                        | Aspergillimide              | Austinol                  |
| 3-Hydroxy-HT-2 Toxin         | Altenuene                        | Asperglaucide*              | Austocystin A             |
| 3-Hydroxyterphenyllin        | Altenuisol*                      | Asperlactone                | Austocystin B             |
| 3-Nitropropionic acid*       | Altenusin                        | Asperloxine A               | Austocystin D             |
| 4,7,15-Triacetylivalenol     | Alternarian acid                 | Aspermytin A                | Austocystin I             |
| 4-Hydroxyalternariol         | Alternarienoic acid              | Aspernigrin A               | Australide D              |
| 4-Methoxycyclopeptin         | Alternariol*                     | Asperphenamate*             | Australide F              |
| 4-Monoacetoxyscirpenol       | Alternariol-3-Glucoside          | Asperthecin                 | Averantin                 |
| 5-Hydroxyculmorin            | Alternariol-9-Glucoside          | Aspinolid B                 | Averantinmethylether      |
| 5-Methylmellein              | Alternariolmethylether*          | Aspinonene                  | Averufanin                |
| 7-Hydroxykaurenolide         | Alternariolmethylether-Glucoside | Aspochalasin C              | Averufin Derivat          |
| 7-Hydroxypestalotin*         | Altersetin*                      | Aspochalasin D              | Averufin*                 |
| 8-Acetylneosolaniol          | Altersolanol                     | Aspochalasin H              | Bacitracin                |
| 8-O-Methylaverufin           | Altertoxin II                    | Aspochalasin I              | Bafilomycin A1            |
| A 23187                      | Altertoxin-I                     | Aspochalasin J              | Banksialactone A          |
| A 26771 B                    | Amauromine                       | Aspochracin                 | Barceloneic acid*         |
| AAL TA-Toxin                 | Amidepsin B                      | Aspterric acid              | Bassianolide*             |
| AAL TB Toxin                 | Aminodimethyloctadecanol         | Aspulvinone E               | Beauvericin*              |
| AAL TD Toxin                 | Amoxycillin                      | Aspulvinone O               | Benzomalvin A             |
| AAL TE Toxin                 | Amphotericin                     | Aspyrone                    | Benzomalvin B             |
| Abscisic acid*               | Anacin                           | Asteltoxin                  | Benzomalvin C             |
| Acetylchaetoglobosin D       | Andrastin A*                     | Asterric acid               | Berkedrimane B            |
| Achaetolide Derivat          | Andrastin B*                     | Asterriquinonedimethylether | Berkeleyacetal B          |
| Acuminatum B*                | Andrastin C*                     | Aszonapyrone A              | Berkeleylctone E          |
| Acuminatum C                 | Andrastin D                      | Atlantinon A                | Berkeleylctone F          |
| Aflatoxicol                  | Andrastin Derivative             | Atpenin A5                  | beta-Zearalenol           |
| Aflatoxin B1                 | Anisomycin                       | Atropine                    | beta-Zearalenol-Glucoside |
| Aflatoxin B2                 | Antibiotic L 696474              | Atroventinmethylether       | Bikaverin*                |
| Aflatoxin G1                 | Antibiotic F 1849 A              | Aurantiamin A               | Biochanin*                |
| Aflatoxin G2                 | Antibiotic PF 1052               | Auranticin A                | Bis(methylthio)gliotoxin* |
| Aflatoxin M1                 | Antibiotic Y*                    | Auranticin A                | Bongkreic acid            |

|                            |                            |                         |                           |
|----------------------------|----------------------------|-------------------------|---------------------------|
| Botryodiplodin             | cyclo(L-Pro-L-Val)*        | Dihydrolysergol         | Fonsecin                  |
| Brasilamide A              | Cycloaspeptide A           | Dihydrosterigmatocystin | Formonetin*               |
| Brefeldin A                | Cycloechinulin             | Dihydrotrichotetronine  | FS-4                      |
| Brevianamid F*             | Cycloheximide              | Dihydroxycalonectrin    | Fulvic acid               |
| Brevicompanine B           | Cyclopenin                 | Dihydroxymellein        | Fumagillin                |
| Butenolid                  | Cyclophenol                | DihydroxyZONMethylether | Fumarprotocetarinic acid  |
| Butyrolacton III           | Cyclopeptine               | Dinactin                | Fumifungin                |
| Butyrolactone I            | Cyclopiazonsäure           | Diplodiatoxin           | Fumigaclavine C*          |
| Butyrolactone II           | Cyclosporin A              | DON-3-glucoside*        | Fumigaclavine*            |
| ButyrolactonII methylether | Cyclosporin B*             | Doxorubicin             | Fumiquinazolin A          |
| Byssochlamic acid          | Cyclosporin C*             | Doxycyclin              | Fumiquinazolin D*         |
| Calonectrin                | Cyclosporin D              | Drimane 6               | Fumiquinazolin Derivat    |
| Calphostin                 | Cyclosporin H              | Drimane 8               | Fumiquinazolin F          |
| Calphostin C*              | Cylindrocapon A4           | Duclauxin               | Fumitremorgin A           |
| Calyxanthone               | Cylindrol B                | Echimidin               | Fumitremorgin B           |
| Carnequinazolin A          | Cytochalasin A             | Elymoclavine            | Fumitremorgin C           |
| Cephalochromin             | Cytochalasin B             | Elymoclavine-Fructoside | Fumonisin A1              |
| Cercosporamide             | Cytochalasin C             | Emericellamide A        | Fumonisin A1 (precursor)* |
| Cercosporin                | Cytochalasin D             | Emericellamide C        | Fumonisin A2              |
| Cereulide                  | Cytochalasin E             | Emericellamide E        | Fumonisin AK2             |
| Ceruleinin                 | Cytochalasin J             | Emestrin*               | Fumonisin B1*             |
| Chaconin*                  | Daidzein*                  | Emindole SA             | Fumonisin B2*             |
| Chaetocin                  | Daidzin*                   | Emodin*                 | Fumonisin B3*             |
| Chaetoglobosin A           | Daunorubicin               | Endocrocin*             | Fumonisin B4*             |
| Chaetoglobosin C           | Deacetylneosolaniol        | Enniatin A*             | Fumonisin B6              |
| Chaetoglobosin D           | Decalonectrin              | Enniatin A1*            | Fungerin                  |
| Chaetoglobosin F           | Dechlorogriseofulvin       | Enniatin B*             | Fusaproliferin*           |
| Chaetominine               | Dechlorogriseofulvin       | Enniatin B1*            | Fusapyron*                |
| Chaetoviridin A            | Dechloroisochromophilon IV | Enniatin B2*            | Fusarenon-X               |
| Chanoclavin*               | Dechloronornidulin         | Enniatin B3             | Fusarinic acid            |
| Chetomin                   | Deepoxy-deoxynivalenol     | Epiequisetin*           | Fusarielin A              |
| Chetoseminudin A           | Deepoxy-T-2 toxin          | Epoxyagrocavin          | Fusarin C                 |
| Chevalone B                | Deepoxy-T-2tetraol         | Epoxyctochalsin C*      | Fusarinolic acid          |
| Chevalone C                | Dehydroaustinol            | Equisetin*              | Fusarisetin A             |
| Chevalone E                | Dehydrocurvularin*         | Eremofortin A           | Fuscofusarin              |
| Chlamydosporidol           | Dehydrocyclopeptine        | Eremofortin B           | Galbinic acid             |
| Chlamydosporol             | Dehydrogriseofulvin        | Ergine                  | Geldanamycin              |
| Chloramphenicol            | Demethoxyviridol           | Ergocornine*            | Genistein*                |
| Chlorocitreorosein         | Demethylasteltoxin         | Ergocorninin*           | Genistin*                 |
| Chloronectrin              | Demethylsulochrin          | Ergocristine*           | Geodin                    |
| Chlortetracyclin           | DeoxyAltersolanol          | Ergocristinine*         | Geodin hydrate            |
| Chrodrimanin               | Deoxybrevianamid E         | Ergocryptine*           | Gibberellic acid          |
| Chromomycin A3             | Deoxyfusapyron             | Ergocryptinine*         | Gibberellin A12           |
| Chrysogin*                 | Deoxygerfelin*             | Ergometrine             | Gibberellin A14           |
| Chrysophanol*              | Deoxynivalenol*            | Ergometrinine*          | Gibberellin A4            |
| Cinereanin                 | Deoxynortryptoquivalin*    | Ergosin*                | Gibberellin A7            |
| Citreohybriddione          | Deoxytryptoquialanine      | Ergosinin*              | Gibepyrone D              |
| Citreohybridinol*          | Deoxytryptoquivaline A     | Ergotamine*             | Gigantenone               |
| Citreoindole               | Desoxypaxillin             | Ergotaminine*           | Gliocladic acid           |
| Citreorosein*              | Desoxyverrucosidin         | Ergovalin               | Gliotoxin                 |
| Citreoviridin              | Destruxin A                | Erucifolin              | Glisprenin D              |
| Citreoviridin C            | Destruxin B*               | Erucifolin-N-Oxid       | Glyantrypine              |
| Citreoviridinol            | Destruxin CHL              | Erythromycin            | Glycitein*                |
| Citrinin*                  | Destruxin D                | Ethylorsellinic acid    | Glycitin*                 |
| Citromycetin               | Destruxin-Ed Derivat       | Europin                 | Grayanotoxin I            |
| Cladosporin                | Dethiosecoemestrin         | Europin-N-Oxid          | Griseofulvin acid         |
| Cladosporone Derivat       | Diacetoxyscirpenol         | Expansolid              | Griseofulvin*             |
| Clonostachydol             | Diacetylcercosporin        | F01 1358-A              | Griseophenone A           |
| CNM 115443                 | Diacetylinalenol           | Fallacinol              | Griseophenone B           |
| Cochlioquinone A           | Dichlorodiaportin          | FB1 Methylester         | Griseophenone C           |
| Colchicine*                | Dichlormethylasterric acid | Fellutanine A*          | Harzianopyridine          |
| Communesin B               | Diffractic acid            | Fellutannine B          | Harzianum A               |
| Cordycepin                 | Dihydroaspypyrone          | Festucavine*            | HC Toxin                  |
| Coumestrol*                | Dihydrochlamydocin         | Filipin                 | Heliotrin                 |
| Culmorin*                  | Dihydrocitrinone           | FK 506                  | Heliotrin-N-Oxid          |
| Curvularin*                | Dihydrocompactin           | FK 9775 A               | Helvolic acid             |
| Curvulin                   | Dihydroergosine            | FK 9775 B               | Helvolinic acid           |
| Cyclo(I-Ala-L-Pro)         | Dihydroergotamine          | Flavipucin              | Heptaibin                 |
| cyclo(L-Leu-L-Pro)         | Dihydrogriseofulvin        | Flavoglaucin*           | Heptelidic acid           |
| cyclo(L-Pro-L-Tyr)*        | Dihydroinfectopyron        | Folipastin              | Herquiline A              |

|                            |                          |                          |                                |
|----------------------------|--------------------------|--------------------------|--------------------------------|
| Hexaacetyl-HFB1            | Lysergol                 | Ochrephilone             | Pyrenocin A                    |
| Hirsutide                  | Macrospheptide A         | Okaramine B              | Pyrenophorol*                  |
| HT-2 Glucoside*            | Macrosporin              | Okaramine D              | Pyripyropene A                 |
| HT-2 toxin*                | Malformin A              | Oligomycin A             | Pyripyropene B                 |
| hydrolysed Fumonisin B1    | Malformin A2             | Oligomycin B             | Pyripyropene D                 |
| hydrolysed Nidulin         | Malformin C              | O-Methylsterigmatocystin | Pyrophen                       |
| Hydroxyandrastin A         | Marcfortine A*           | O-Methylviridicatin      | Quadrone                       |
| Hydroxyandrastin C*        | Marcfortine C*           | Ononin*                  | Questiomycine A*               |
| Hydroxycarnequinazolin A   | Meleagrin                | Ophiobolin A             | Questiomycine Derivat*         |
| Hydroxycurcularin          | Meleagrin Derivative     | Ophiobolin B             | Questiomycine*                 |
| Hydroxypaspaline           | MER-NF5003E              | Orsellinic acid          | Quinadoline A                  |
| Hydroxysulchorin           | MER-NF5003F              | Oxalicine B              | Quinadoline B                  |
| Hydroxysydonic acid        | Methoxycurcularin        | Oxaline                  | Quinolactacin A                |
| Hyoscin                    | Methoxysterigmatocystin  | Oxidized Elymoclavine    | Quinolactacin B                |
| Hypothemycin               | Methylasterric acid      | Oxidized Luol            | Quinolone A                    |
| Illicicolin A*             | Methylequisetin          | Oxisterigmatocystin E    | Radicicol                      |
| Illicicolin B*             | Methylfunicone           | Oxyskyrin*               | Radicinin*                     |
| Illicicolin C              | Methylorsellinic acid    | Papyracillic acid A      | Radicinol                      |
| Illicicolin E*             | Methylsulochrin*         | Paracelsin A             | Radicionic acid                |
| Illicicolin F              | Mevastatin               | Paracelsin B             | Rapamycin                      |
| Illicicolin H*             | Mevinolin*               | Paraherquamide A         | Rasfonin                       |
| Indicin_IM_LA              | Mithramycin C            | Paraherquamide E         | Retrorsin                      |
| Indicin_IM_LA-N-Oxid       | Mitomycin                | Paspalic acid            | Roquefortine C*                |
| Infectopyron*              | Mitorubinic acid         | Paspalin                 | Roquefortine D*                |
| Integracin A*              | Mollicellin D            | Paspalinin               | Roquefortine E                 |
| Integracin B*              | Monactin                 | Paspalitrem A            | Roridin A                      |
| Ionomycin                  | Moniliformin*            | Paspalitrem B            | Roridin L2                     |
| Irgasan                    | Monoacetoxyscirpenol*    | Patulin                  | Roritoxin C                    |
| Isocereulide A             | Monocerin*               | Paxillin                 | Rorotoxin A                    |
| Isochromophilon III        | Monocrotalin             | Pencillazaphilone B      | Rosellichalasin                |
| Isochromophilon IV         | Monocrotalin-N-Oxid      | Penicillic acid          | Rubellin D*                    |
| Isochromophilon IX         | Monomethylcurvulin       | Penicillide              | Rubratoxin A                   |
| Isochromophilone VI        | MPA Derivative           | Penicillin G             | Rubrofusarin                   |
| Isofusidienol              | Mycophenolic acid IV     | Penicillin V             | Rugulosin                      |
| Isokotanin B               | Mycophenolic acid*       | Penicnoline              | Rugulotrosin                   |
| Isoopenicillide Derivative | Myriocin*                | Penicolate               | Rugulovasine A                 |
| Iso-Rhodoptilometrin*      | Mytoxin C                | Penigequinolone A        | Rugulovosine*                  |
| Isosulochrin               | N-0352A                  | Peniprequinolone         | Salazinic acid                 |
| Jacobin                    | N-0532B                  | Penitrem A               | Sambucinol                     |
| Jacobin-N-Oxid             | N-Acetyl-HFB1            | Pennigritrem A           | Sartorypron                    |
| Janthitrem A               | N-Benzoyl-Phenylalanine* | Pentahydroxyscirpenol    | Sartorypyrone B                |
| Josamycin                  | Neoechinulin A*          | Pentoxifylline           | Satratoxin F                   |
| K252a                      | Neosartorin              | Pestalone                | Satratoxin G                   |
| K252b                      | Neosolaniol              | Pestalotin*              | Satratoxin H                   |
| K-76 Derivative 4          | Neoxaline                | Petromurin C             | Scalusamid A                   |
| Kipukasin A                | NG 012                   | PF 1163 A                | Sch 725680                     |
| Kipukasin B                | Nidulin                  | Phaseolinone             | Scirpentriol                   |
| Kipukasin D                | Nidurufin                | Phenopyrrozin*           | Sclerotigenin                  |
| KO 143                     | Nigericin                | Phenylpyropene A         | Sclerotin A                    |
| Kojic acid*                | Nigragillin              | Phomalone                | Sclerotioramin                 |
| Koninginin A               | Nigrosporoate A          | Phomopsidin              | Sclerotiorin                   |
| Koninginin B               | Nivalenol Glucoside      | Phomopsin A              | Secalonic acid B               |
| Koninginin D               | Nivalenol*               | Phomopsolide B           | Secalonic acid D               |
| Koninginin E               | Nocardamine              | Phomoxanthone A          | Secalonic acid F               |
| Kotanin A                  | Nonactin                 | Phthalexin               | Secoemestrin C Derivat         |
| Kumbicin C                 | Norcitreoivridin         | p-Hydroxyphenopyrrozin   | seco-Sterigmatocystin          |
| Lasiocarpin                | Norlichexanthone*        | Physcion*                | semi Xanthomegnin              |
| Lasiocarpin-N-Oxid         | Nornidulin               | Pinselin                 | semi-Vioxanthin                |
| Lecanoric acid*            | Norsolorinic acid        | Piscarinin A             | Senecionin_Senecivernin        |
| Leoidin                    | Norstictic acid          | Porritoxinol             | Senecionin_Senecivernin_N-Oxid |
| Linamarin*                 | Nortryptoquialanine      | Prehelminthosporol       | Seneciphylline                 |
| Lincomycin                 | Norverrucosidin          | Prehelminthosporollacton | Seneciphylline-N-Oxide         |
| LL-Z 1272e*                | Notoamide Derivative     | Prelaptin                | Senkirkin                      |
| LLZ 1640-2                 | Notoamide E Derivat      | Preussin                 | Setusosin                      |
| LLZ 1640-4                 | NT-2 Toxin               | Pseurotin A              | Siccanin                       |
| Lolitrem B                 | Obscurolide A1           | Puberulin A              | Siccanol*                      |
| Lolitrem N                 | Ochratoxin A*            | Puromycin                | Sissotrine                     |
| Lotaustralin*              | Ochratoxin alpha         | Purpactin A              | Skyrin*                        |
| Luteoskyrin                | Ochratoxin B             | Purpuride                | S-MethylDON                    |
| Luteusin A                 | Ochratoxin C             | Pyranonigrin             | Sorbicillacton A               |

|                                 |                          |                                |                          |
|---------------------------------|--------------------------|--------------------------------|--------------------------|
| Sphingofungin B                 | Tenuazonic acid*         | Trichoverrin A                 | Versiconol               |
| Sphingofungin D                 | Ternatin*                | Trypacidin*                    | Verticillin A            |
| Spiculisporic acid              | Terpendole C             | Tryprostatin A                 | Violaceic acid           |
| Spiramycin                      | Terpendole E             | Tryprostatin B                 | Violaceol I              |
| Spirodihydrobenzofuranlactam IV | Terpendole I             | Tryptophol*                    | Violaceol II             |
| Sporidesmolide II*              | Terphenyllin             | Tryptoquialanine               | Viomellein               |
| Sporogen AO I                   | Terragine E              | Tryptoquialanine Derivat       | Vioxanthin               |
| Stachybotryamide                | Terrecyclic acid         | Tryptoquivaline A              | Viridicatin              |
| Stachybotrylactam               | Terrein                  | Tryptoquivaline F              | Viridicatol              |
| Stachybotrysin B                | Terretonin               | Tryptoquivaline G              | Viridicatum toxin        |
| Staurosporin                    | Terretonin F Derivat     | Tylosin                        | Viriditoxin              |
| Stemphylperyleneol              | Territrem A              | Ulocladol                      | Viridol                  |
| Sterigmatocystin*               | Territrem B              | Unguinol                       | Vulpinic acid            |
| Sticitc acid                    | Tetraacetlnivalenol      | Unugisin E                     | W493*                    |
| Strobilactone A                 | Tetraacetyl-T-2 Tetraol  | Usnic acid*                    | WIN 68577                |
| Sulochrin                       | Tetracycline             | Ustiloxin A                    | WIN-64821                |
| Surfactin A                     | Tetrahydrobostrycin      | Ustiloxin B                    | Wortmannin               |
| Surfactin B                     | Thailandolide B          | Ustiloxin D                    | Xanthomegnin             |
| Sydonic acid                    | Thaxtomin A              | Ustusol A                      | Xanthotoxin*             |
| Sydonol                         | Thielavin B              | Valinomycin                    | Xantocillin X1           |
| Sydowinin A                     | Toxoflavin               | Vancomycin                     | Yaequinolone J2          |
| Sydowinin B                     | Triacetoxyscirpenol      | Vermistatin                    | Zearalenone*             |
| sydowinol                       | Triacetyl-Deoxynivalenol | Verrucaric A                   | Zearalenone-14-glucoside |
| T-2 Glucoside                   | Trichalasin B            | Verrucaric J                   | Zearalenone-16-Glucoside |
| T-2 toxin*                      | Trichodermamide C        | Verrucarol                     | Zinndiol*                |
| T2-Tetraol                      | Trichodermin             | Verrucofortine                 | Zinniamide               |
| T2-Triol                        | Trichodesmin             | Verrucosidin                   | Zinniol*                 |
| Tanzawaic acid B                | Trichodimerol            | Verruculogen                   |                          |
| Taxol                           | Trichostatin A           | Verruculotoxin                 |                          |
| Tenellin                        | Trichotetronine          | Versicolorin A                 |                          |
| Tensidol B                      | Trichothecin             | Versicolorin C*                |                          |
| Tentoxin*                       | Trichothecolone          | Versiconal Acetat (Hemiacetal) |                          |

**Table S2.** Odds ratio estimates and profile-likelihood confidence intervals of forage inclusion levels as dietary risk factors for high *Fusarium* mycotoxin loads (above 75th percentile concentrations)

| Forage sources            | Estimate | 95% confidential limits |       |
|---------------------------|----------|-------------------------|-------|
| Maize silage              | 1.085    | 1.007                   | 1.168 |
| Grass silage              | 0.966    | 0.908                   | 1.023 |
| Straw                     | 2.004    | 1.372                   | 3.193 |
| Hay                       | 0.997    | 0.850                   | 1.215 |
| Brewer spent grain silage | 1.056    | 0.792                   | 1.446 |
| Other silage              | 1.624    | 1.086                   | 2.689 |

**Figure S1.** Predicted probabilities for high *Fusarium* mycotoxin loads (above 75th percentile concentrations) related to the proportion of (A) maize silage and (B) straw in the dietary rations of Austrian dairy cows.

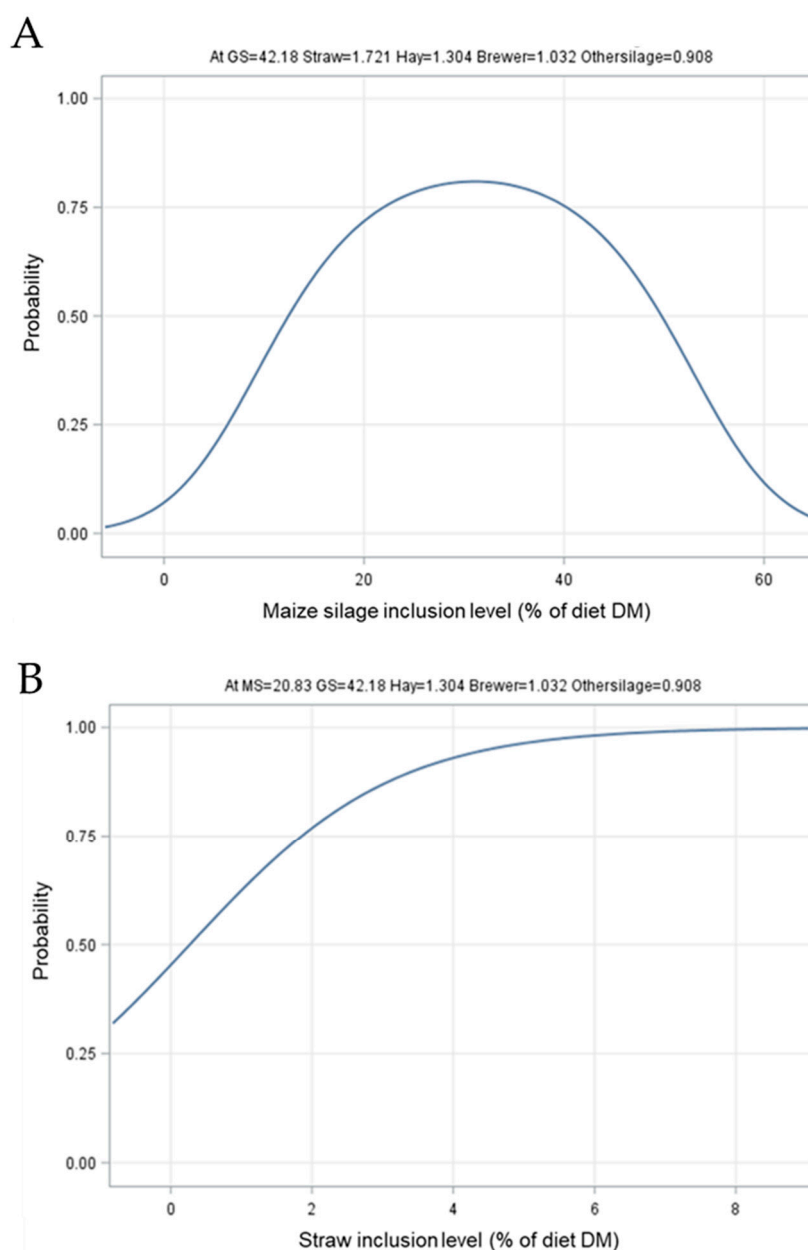

Supplement: s1 [file s1]
